# Supplementary material for: Genome-Wide Prediction of Transcription Start Sites in Conifers
Source: MDPI journal article supplement (doi:10.3390/ijms23031735), 2022-02-03
Supplement: s1 [file s1]

# Supplementary Materials

## Genome-wide prediction of transcription start sites in conifers

Eugenia I. Bondar<sup>1,2</sup>, Maxim Troukhan<sup>3</sup>, Konstantin V. Krutovsky<sup>1,4-8</sup>, Tatiana V. Tatarinova<sup>8-11</sup>

<sup>1</sup> Laboratory of Forest Genomics, Institute of Fundamental Biology and Biotechnology, Siberian Federal University, 660036 Krasnoyarsk, Russia

<sup>2</sup> Laboratory of Genomic Research and Biotechnology, Federal Research Center “Krasnoyarsk Science Center,” Siberian Branch, Russian Academy of Sciences, 660036 Krasnoyarsk, Russia

<sup>3</sup> Persephone Software LLC, 91301 Agoura Hills, CA, USA

<sup>4</sup> Department of Forest Genetics and Forest Tree Breeding, Georg-August University of Göttingen, 37077 Göttingen, Germany

<sup>5</sup> Center for Integrated Breeding Research, Georg-August University of Göttingen, 37075 Göttingen, Germany

<sup>6</sup> Laboratory of Population Genetics, N.I. Vavilov Institute of General Genetics, Russian Academy of Sciences, 119333 Moscow, Russia

<sup>7</sup> Scientific and Methodological Center, G. F. Morozov Voronezh State University of Forestry and Technologies, 394087 Voronezh, Russia

<sup>8</sup> Department of Genomics and Bioinformatics, Institute of Fundamental Biology and Biotechnology, Siberian Federal University, 660074 Krasnoyarsk, Russia

<sup>9</sup> Department of Biology, University of La Verne, 91750 La Verne, CA, USA

<sup>10</sup> Functional Genomics Group, N. I. Vavilov Institute of General Genetics, Russian Academy of Sciences, 119333 Moscow, Russia

<sup>11</sup> A.A. Kharkevich Institute for Information Transmission Problems, Russian Academy of Sciences, 127051 Moscow, Russia

**Table S1.** Resources used in the study.

| Resource                                        | Source                         | Identifier or filename                                                                                                |
|-------------------------------------------------|--------------------------------|-----------------------------------------------------------------------------------------------------------------------|
| <b>Data</b>                                     |                                |                                                                                                                       |
| <i>P. taeda</i> genome assembly and annotation  | treegenesdb.org                | Pita.2_01.fa<br>Pita.2_01.gff                                                                                         |
| <i>P. abies</i> genome assembly and annotation  | ConGenIE FTP on plantgenie.org | Pabies1.0-genome.fa.gz<br>Pabies1.0-HC.gff3<br>Pabies1.0-MC.gff3                                                      |
| <i>P. glauca</i> genome assembly and annotation | ConGenIE FTP on plantgenie.org | PG29-v3.fa<br>manualannotations-PG29V3.gff3<br>PG29v3-renamedID_1000nt.gff                                            |
| <i>L. sibirica</i> genome assembly              | NCBI GenBank                   | NWUY0000000000                                                                                                        |
| <i>P. glauca</i> TSA                            | NCBI GenBank                   | GCHX000000000                                                                                                         |
| <i>P. glauca</i> TSA                            | NCBI GenBank                   | GCZO000000000                                                                                                         |
| <i>P. glauca</i> TSA                            | NCBI GenBank                   | GFBZ000000000                                                                                                         |
| <i>P. glauca</i> TSA                            | treegenesdb.org                | Pagl_TSA.fasta                                                                                                        |
| <i>P. glauca</i> ESTs (313110 entries)          | NCBI GenBank                   |                                                                                                                       |
| <i>P. glauca</i> ESTs                           | treegenesdb.org                | Pagl_EST.fasta                                                                                                        |
| <i>P. abies</i> ESTs (14345 entries)            | NCBI GenBank                   |                                                                                                                       |
| <i>P. abies</i> putative unique transcripts     | Chen et al., 2012              | DRYAD DOI 10.5061/dryad.ds2gp                                                                                         |
| <i>P. abies</i> Trinity transcripts assembly    | ConGenIE ftp on plantgenie.org | trinity.minKmer10.validated.fna.gz                                                                                    |
| <i>P. taeda</i> Sanger and 454 ESTs             | PineDB Version 1.0             | t3352.454.sanger.seqclean.newblertrim.tgz ( <a href="http://bioinfolab.muohio.edu">http://bioinfolab.muohio.edu</a> ) |
| <i>P. taeda</i> ESTs (328662 entries)           | NCBI GenBank                   |                                                                                                                       |
| <i>P. taeda</i> ESTs                            | treegenesdb.org                | Pita_EST.fasta                                                                                                        |
| <i>A. thaliana</i> genome annotation            | arabidopsis.org                | TAIR10_GFF3_genes.gff                                                                                                 |
| <i>A. thaliana</i> promoter sequences           | arabidopsis.org                | TAIR10_upstream_1000_translation_start_20101028.txt                                                                   |
| <i>O. sativa</i> genome annotation              | NCBI GenBank                   | GCF_001433935.1                                                                                                       |
| <i>S. bicolor</i> genome annotation             | NCBI GenBank                   | GCF_000003195.3                                                                                                       |
| <i>P. trichocarpa</i> genome annotation         | NCBI GenBank                   | GCF_000002775.4                                                                                                       |

| Resource                       | Source                                                                                                                        | Identifier or filename                                                                                     |
|--------------------------------|-------------------------------------------------------------------------------------------------------------------------------|------------------------------------------------------------------------------------------------------------|
| <b>Software and Algorithms</b> |                                                                                                                               |                                                                                                            |
| bedtools                       | Quinlan laboratory,<br>University of Utah                                                                                     | bedtools.readthedocs.io                                                                                    |
| Hisat2                         | Johns Hopkins<br>University                                                                                                   | ccb.jhu.edu/software/hisat                                                                                 |
| TSSPlant                       | Computational<br>Bioscience Research<br>Center (CBRC), King<br>Abdullah University<br>of Science and<br>Technology<br>(KAUST) | <a href="http://www.cbrc.kaust.edu.sa/download">http://www.cbrc.kaust.edu.sa/download</a>                  |
| PromPredict                    | Molecular Biophysics<br>Unit, IISC                                                                                            | nucleix.mbu.iisc.ernet.in/prompredict                                                                      |
| TRANSFAC                       | QIAGEN GmbH                                                                                                                   | <a href="https://genexplain.com">https://genexplain.com</a>                                                |
| MATCH                          | QIAGEN GmbH                                                                                                                   | <a href="https://genexplain.com">https://genexplain.com</a>                                                |
| MEME suite 5.3.3               | National Institutes of<br>Health                                                                                              | <a href="https://meme-suite.org/meme">https://meme-suite.org/meme</a>                                      |
| R package stringr              | CRAN                                                                                                                          | <a href="http://cran.r-project.org/web/packages/stringr">cran.r-project.org/web/packages/stringr</a>       |
| R package seqinr               | CRAN                                                                                                                          | <a href="http://cran.r-project.org/web/packages/seqinr">cran.r-project.org/web/packages/seqinr</a>         |
| R package ggplot2              | CRAN                                                                                                                          | <a href="http://cran.r-project.org/web/packages/ggplot2">cran.r-project.org/web/packages/ggplot2</a>       |
| R package data.table           | CRAN                                                                                                                          | <a href="http://cran.r-project.org/web/packages/data.table">cran.r-project.org/web/packages/data.table</a> |
| R package ggsci                | CRAN                                                                                                                          | <a href="http://cran.r-project.org/web/packages/ggsci">cran.r-project.org/web/packages/ggsci</a>           |
| R package Biostrings           | bioconductor.org                                                                                                              | 10.18129/B9.bioc.Biostrings                                                                                |
| R package reshape2             | CRAN                                                                                                                          | <a href="http://cran.r-project.org/web/packages/reshape2">cran.r-project.org/web/packages/reshape2</a>     |

**Table S2.** Independent two-sample Mann Whitney U Test (two-sample Wilcoxon rank-sum test) results for GC3-poor and -rich genes (CDS sequences).

| Species                                  | W      | p-value                  |
|------------------------------------------|--------|--------------------------|
| Siberian larch ( <i>Larix sibirica</i> ) | 438206 | $< 2.2 \times 10^{-16}$  |
| Norway spruce ( <i>Picea abies</i> )     | 180196 | $< 2.20 \times 10^{-16}$ |
| White spruce ( <i>Picea glauca</i> )     | 286581 | $6.09 \times 10^{-12}$   |
| Loblolly pine ( <i>Pinus taeda</i> )     | 539415 | $< 2.20 \times 10^{-16}$ |

**Table S3.** Number of promoters containing TATA-box or CA initiator motif or both TATA and CA.

| Species            | Total promoters | TATA (%)    | CA (%)        | Both (%)  | Ratio TATA to TATA with CA |
|--------------------|-----------------|-------------|---------------|-----------|----------------------------|
| <i>L. sibirica</i> | 22 291          | 1 295 (5.8) | 10 262 (46.0) | 664 (3.0) | 2.0                        |
| <i>P. abies</i>    | 10 120          | 640 (6.3)   | 4 965 (49.1)  | 331 (3.3) | 1.9                        |
| <i>P. glauca</i>   | 16 255          | 911 (5.6)   | 7 772 (47.8)  | 460 (2.8) | 2.0                        |
| <i>P. taeda</i>    | 9 064           | 713 (7.9)   | 4 707 (51.9)  | 426 (4.7) | 1.7                        |
| <i>A. thaliana</i> | 27 100          | 1 472 (5.4) | 14 380 (53.1) | 911 (3.4) | 1.6                        |

**Table S4.** Parameters used for running HISAT, BLAST, CG-skew analysis and selection of the best 5' UTR prediction.

| Tool             | Parameters                                                                                                                                                                                                                                 |
|------------------|--------------------------------------------------------------------------------------------------------------------------------------------------------------------------------------------------------------------------------------------|
| HISAT2           | hisat2 -x <genome_index> -f -U <RNA_&_EST> --no-unal -p 20 --no-hd -S out.sam                                                                                                                                                              |
| BLAST            | blastp -query proteins.faa -db Refseq_plant -outfmt "6 qacc sacc stitle evalue length pident qstart qend sstart send" -num_threads 20 -max_target_seqs 5                                                                                   |
| 5'-UTR selection | $f(x) = \frac{1}{\Gamma(k)\theta^k} x^{k-1} e^{-\frac{x}{\theta}}$ $\theta = \text{variance} / \text{mean}$ $k = \text{mean} / \theta$ $\text{Density} = \text{dgamma}(\text{TSS}\$length, \text{shape} = k, \text{scale} = \text{theta})$ |
| CG-skew          | $CGskew_i = (nC_i - nG_i) / (nC_i + nG_i),$ <p>nC<sub>i</sub>, nG<sub>i</sub> – number of C and G nucleotides in a window <i>i</i>,<br/>The sliding window was 50 bp wide, and a window increment step of 10 bp.</p>                       |

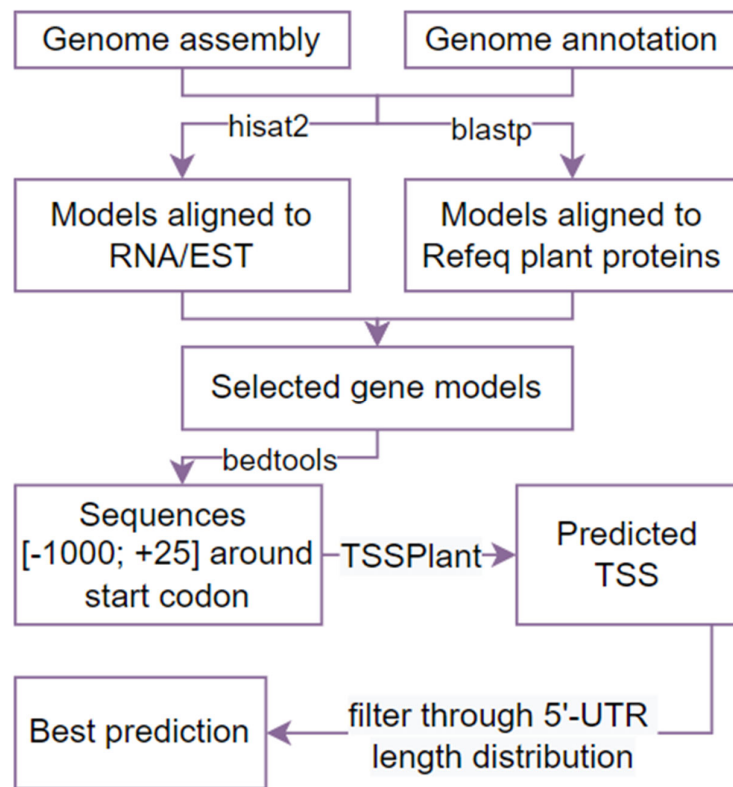

**Figure S1.** The workflow for the genome-wide TSS identification.

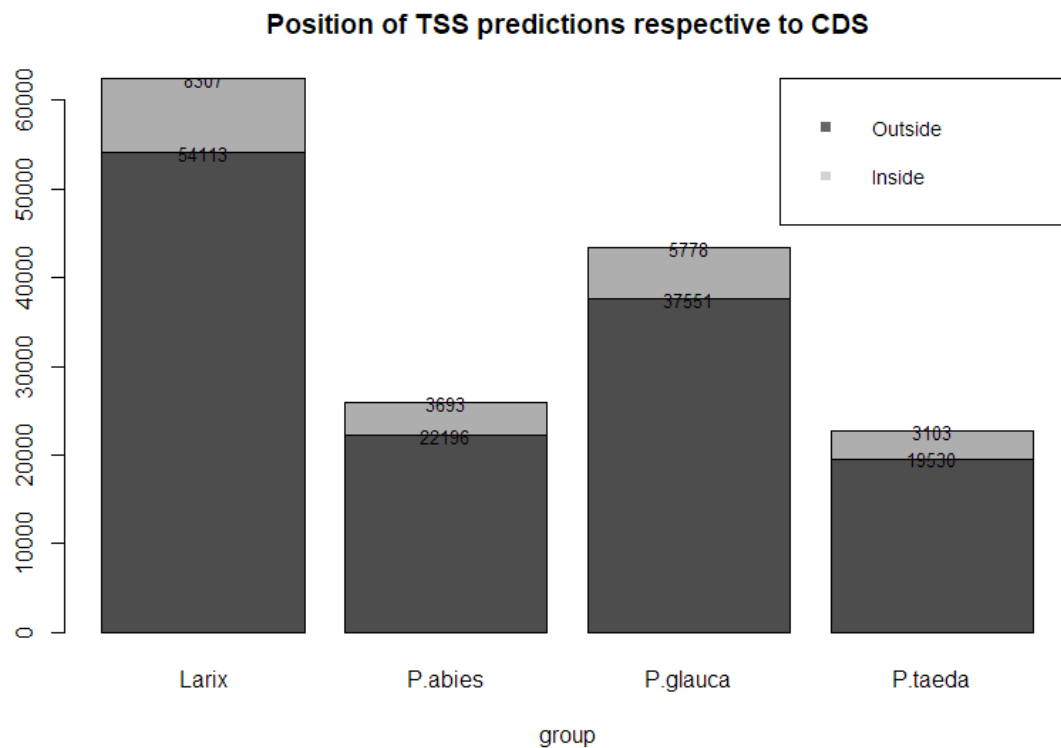

**Figure S2.** The number of predicted TSSs in *L. sibirica*, *P. abies*, *P. glauca* and *P. taeda* (before filtering through typical 5'-UTR length distribution) that intersect their respective gene models.

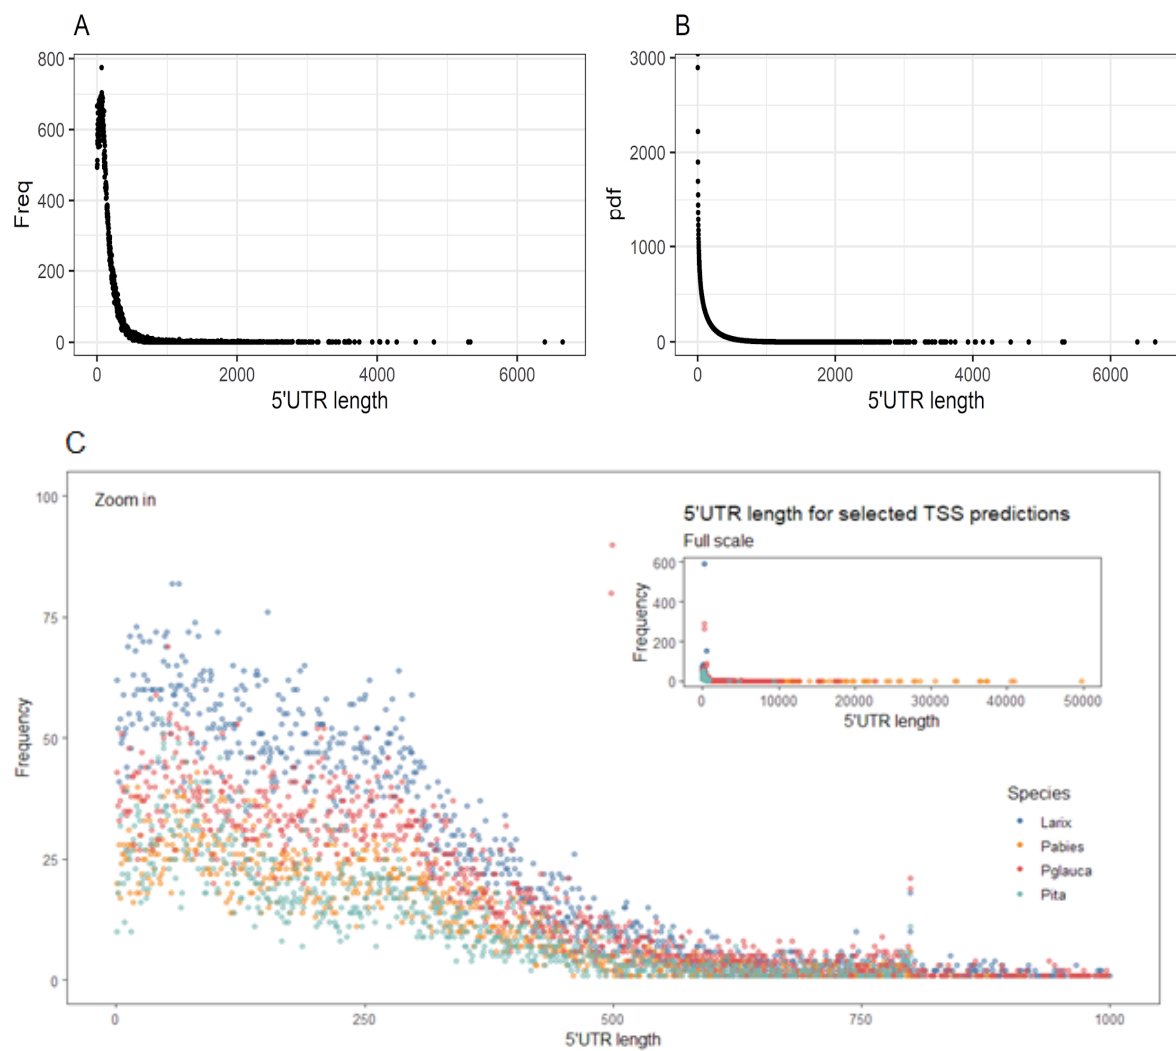

**Figure S3.** **A** and **B**: the distribution of 5'UTR lengths based on *A. thaliana*, *P. trichocarpa*, *O. sativa* and *S. bicolor*; **C**: the distribution of 5'UTR lengths in four conifer species.

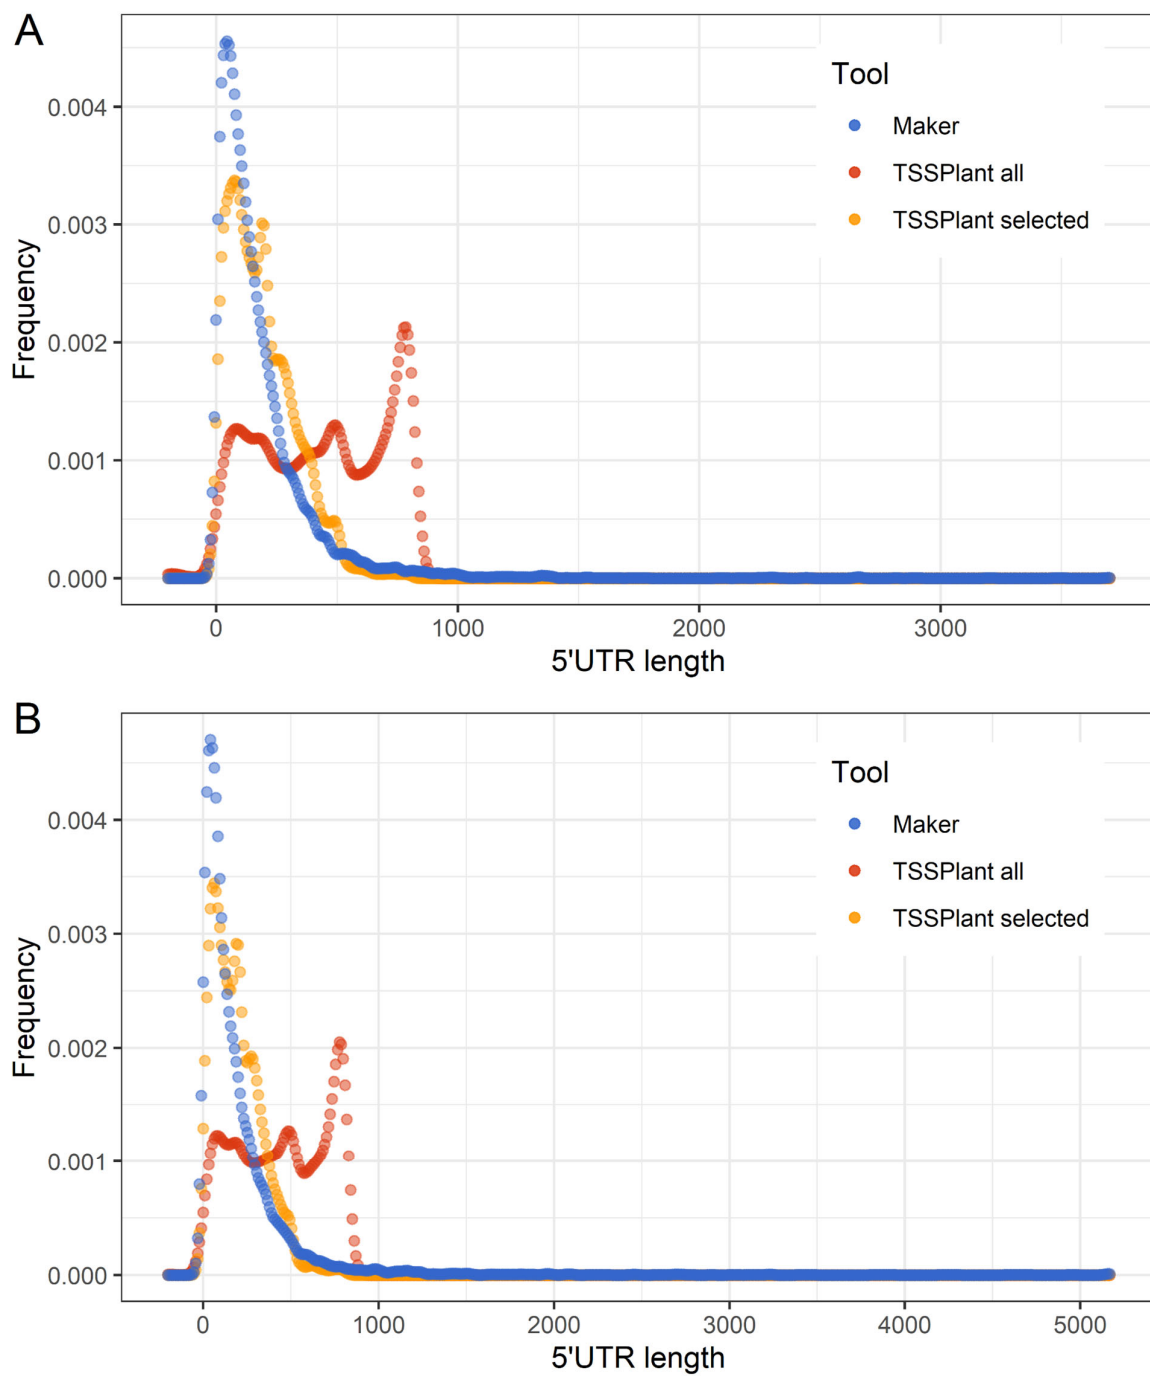

**Figure S4.** Comparison of 5'UTR length predicted by the Maker pipeline and by TSSPlant in the genome of *L. sibirica* (A) and *P. glauca* (B).

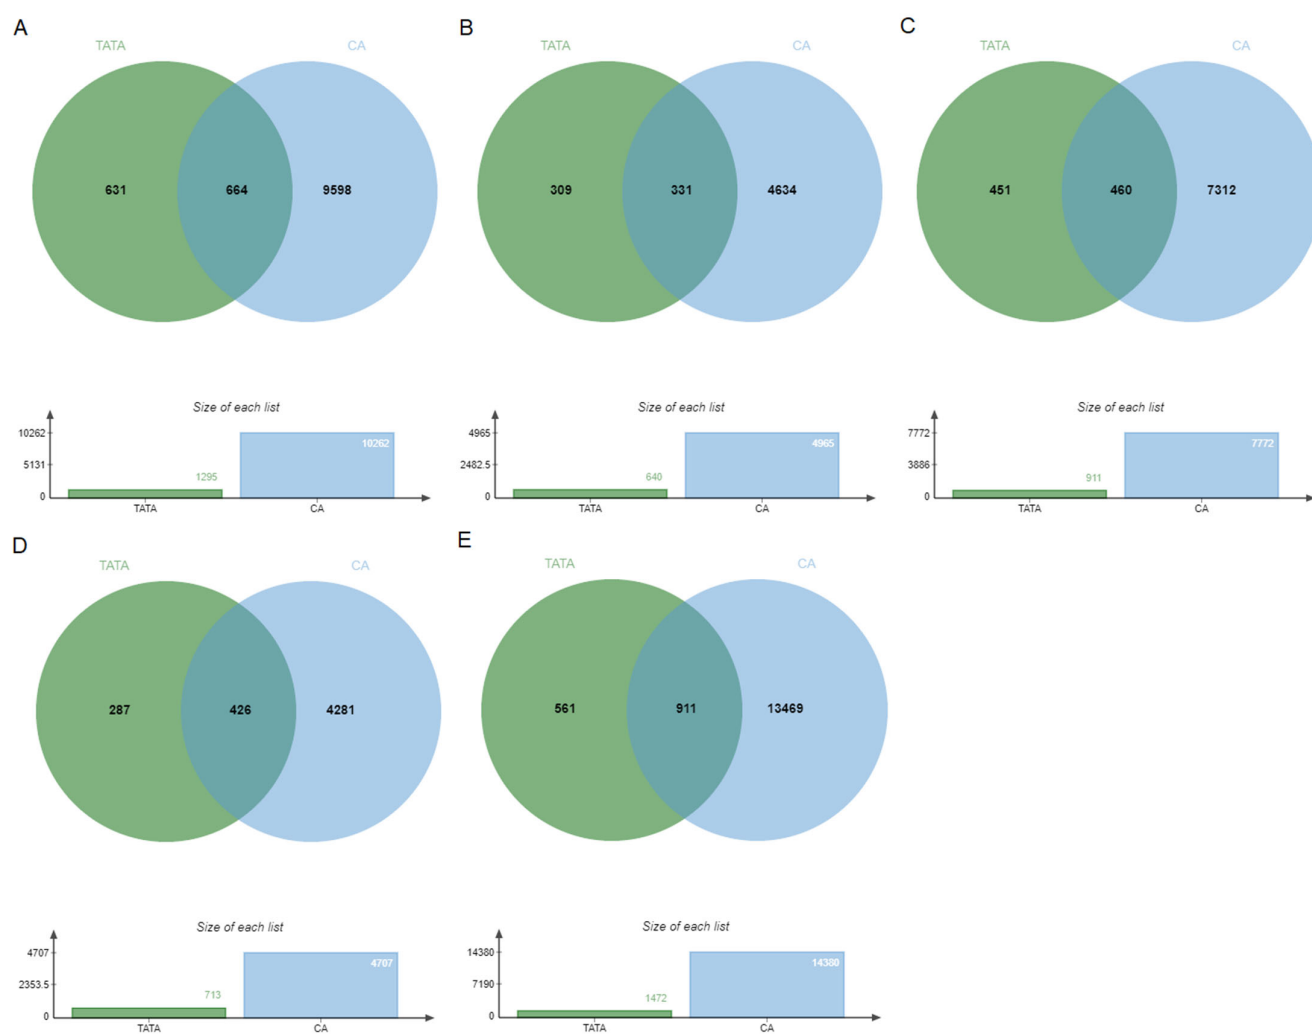

**Figure S5.** Number of promoters containing TATA-box (green circle) or CA (blue circle) or both motifs. **A** – *L. sibirica*, **B** – *P. abies*, **C** – *P. glauca*, **D** – *P. taeda*, **E** – *A. thaliana*.



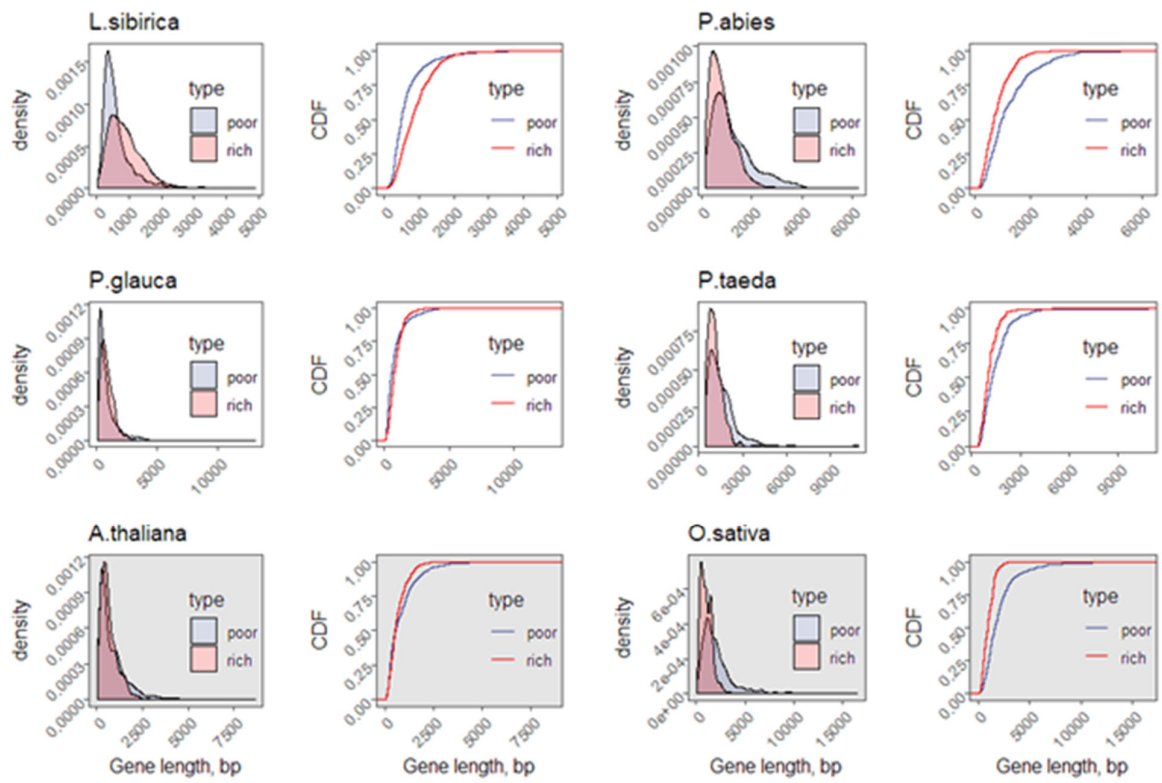

**Figure S6.** Gene length distribution and cumulative distribution (CDF) in GC3-poor and GC3-rich genes for four conifer species (*L. sibirica*, *P. abies*, *P. glauca* and *P. taeda*) and two model plant species (*A. thaliana* and *O. sativa*)
